# Supplementary material for: Global simulation of semivolatile organic compounds – development and evaluation of the MESSy submodel SVOC (v1.0)
Source: Copernicus journal article supplement (doi:10.5194/gmd-12-3585-2019), 2019-08-19
Supplement: Supplementary file 1 [file gmd-12-3585-2019-supplement.zip]

# SVOC (Version 1.0) User Manual

*Semivolatile Organic Compounds*

**Mega Octaviani, Holger Tost, Gerhard Lammel**

Multiphase Chemistry Department  
Max Planck Institute for Chemistry  
and  
Institute for Atmospheric Physics  
Johannes Gutenberg University Mainz

m.octaviani@mpic.de  
tosth@uni-mainz.de  
g.lammel@mpic.de

This manual is part of the electronic supplement of our article "Global simulation of semivolatile organic compounds – development and evaluation of the MESSy submodel SVOC (v1.0)" in Geosci. Model Dev. (2019) available at <http://www.geosci-model-dev.net>.

SVOC is a new MESSy submodel to simulate tracers in the semivolatile organic group. All important cycling processes including emission, gas–particle partitioning, air–surface exchange, deposition, and degradation are calculated in the submodel through the calling sequence of process subroutines illustrated in Figure 1. A number of process parameterizations in the areas of gas–particle partitioning, soil volatilization, and the heterogeneous chemistry of benzo[a]pyrene (BaP) are available for use. Specifically, gas–particle partitioning is computed using one of four schemes: (1) Junge–Pankow (Junge, 1977; Pankow, 1987), (2) Finizio (Finizio et al., 1997), (3) Lohmann–Lammel (Lohmann and Lammel, 2004), and (4) Poly-parameter linear free energy relationships (ppLFER) (Goss and Schwarzenbach, 2001; Endo and Goss, 2014; Shahpoury et al., 2016). The soil volatilization is implemented using one of two parameterizations: the Jury scheme (Jury et al., 1983, 1990) and the Smit scheme (Smit et al., 1997). For BaP heterogeneous oxidation by  $O_3$ , four options are available for calculating the reaction rate: (1) Pöschl scheme (Pöschl et al., 2001), (2) Kwamena scheme (Kwamena et al., 2004), (3) Kahan scheme (Kahan et al., 2006), and (4) ROI-T scheme (Mu et al., 2018).

The following information lists major components in SVOC version 1.0, to be implemented within the ECHAM\_v.5.3.0/MESSy\_v2.50 model.

## 1 Namelist

The first step before running the submodel involves defining several input parameters in `svoc.nml` file. The template for this file can be seen in Figure 2.

### 1. Process switches:

- `L_GP`: Switch to determine whether the calculations are for grid point (GP) tracers.
- `L_LG`: Switch to determine whether the calculations are for Lagrangian (LG) tracers. The current SVOC version only works for grid-point representation (hence, `L_GP` should always be `.TRUE.`, and `L_LG` should be `.FALSE.`).
- `l_svocpart`: Switch for gas–particle partitioning calculation. Default: `.TRUE.`
- `l_svocvola`: Switch for volatilization from the surface. If this process is switched off, the AIRSEA submodel should also be turned off. Default: `.TRUE.`
- `l_glacier`: Switch to include glacier compartment. Default: `.FALSE.`
- `l_landsnow`: Switch to include snow compartment. Default: `.FALSE.`
- `l_mode_partition`: If set to `.TRUE.`, the particulate-phase SVOC tracers will be discretized into the 7 aerosol modes applied in the GMXe and M7 submodels (*ns*: nucleation soluble, *ks*: Aitken soluble, *as*: accumulation soluble, *cs*: coarse soluble, *ki*: Aitken insoluble, *ai*: accumulation insoluble, and *ci*: coarse insoluble). Default: `.FALSE.` (the particle is treated as bulk species).

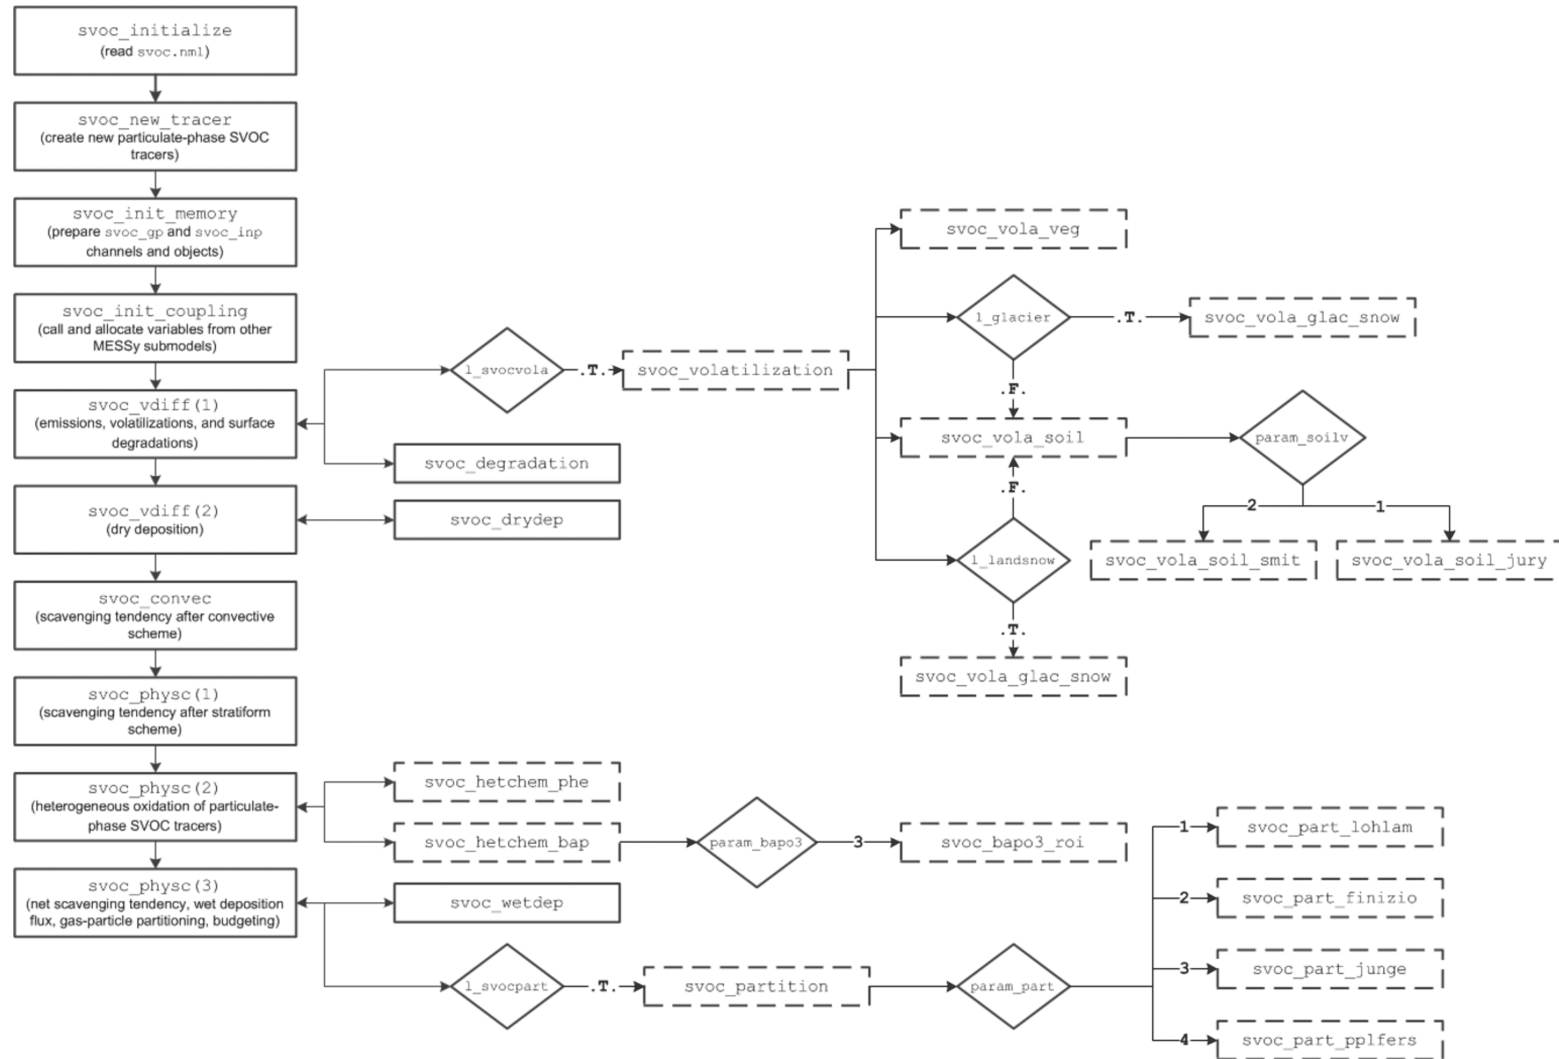

Figure 1: Calling sequence of process subroutines in SVOC submodel

```

! *. f90 *.

! *****
! control namelist
! *****

&CTRL

L_GP      = T ! SVOCs as grid-point tracers (default = T)
L_LG      = F ! SVOCs as lagrangian tracers (default = F)
l_svocpart = T ! switch for gas-particle partitioning (default = T)
              ! if set to .false., l_mode partition will be ignored
l_svocvola = T ! switch for surface volatilization (default = T)
              ! caution: if set to .false., turn off airsea submodel
l_glacier  = T ! switch for (with or no) glacier compartment (default = F)
l_landsnow = T ! switch for (with or no) snow compartment (default = F)

/

! *****
! coupling namelist
! *****

&CPL

l_mode_partition = T ! switch for modal partitioning (default = F)
                    ! if set to .false., use bulk partitioning and
                    ! ignore REMIS_MOD

param_part = 4 ! scheme for gas-particle partitioning:
               ! 1 -> Lohmann-Lammel (2004)
               ! 2 -> Finizio (1997)
               ! 3 -> Junge-Pankow (1987)
               ! 4 -> ppLFER (Abraham, 1993; Goss 2005; Pourya et al., 2016)

param_soilv = 2 ! scheme for volatilization from soil (if l_svocvola = T):
               ! 1 -> Smit (1997)
               ! 2 -> Jury (1983)

param_bapo3 = 2 ! scheme for heterogeneous oxidation of bap by ozone:
               ! 1 -> Poeschl (2001)
               ! 2 -> Kwamena (2004)
               ! 3 -> ROI(T) (2018)
               ! 4 -> Kahan (2006)

aermod_str = 'gmxe' ! 'm7' or 'gmxe'

! import sea spray (AS mode) aerosol fluxes (channel, object)
! flux unit must be in kg m-2 s-1
imp_ss_as_flux = 'onemis', 'mss_as_lsce'

! import input data (channel, object)
imp_cm_soil = 'import_rgt', 'soil_fcms'
imp_rho_soil = 'import_rgt', 'soil_rhos'
imp_mld_oce = 'import_rgt', 'oce_ocn_mld'

! *****
!
! NOTES:
! --> MAX 100 tracers
!
! SVOC_NAME(#) = tracer name, max 10 chars (should be the same with those
!               set in mecca)
! EMISS_IN(#) = import emission (channel name, channel object)
! MOLMASS(#) = molar mass of tracer [g mol-1]
! MOLVOL(#) = molar volume at boiling point [cm3 mol-1]
! RKSOIL(#) = biotic and abiotic decay rate in soil [s-1]
! RKOCEAN(#) = biotic and abiotic decay rate in ocean [s-1]
! RWSOL(#) = water solubility [mg l-1] at 298 K
! RVAPP(#) = saturated vapor pressure [Pa] at 298 K
! RHSOL(#) = heat of solution [J mol-1] at 298 K
! RHVAP(#) = heat of vaporisation [J mol-1] at 298 K
! RHSUB(#) = heat of sublimation (condensation of sub-cooled liq)
!            at 298 K [J mol-1]
!

```

Figure 2: SVOC namelist example

```

! RLOGKOW(#) = octanol-water partition coefficient
! RKDAM(#) = slope of temp-dependent gas-particle partition coeff [K]
! RKDAB(#) = intercept of temp-dependent gas-particle partition coeff
! KAHENRY(#) = henry parameter A [M atm-1]
! KBHENRY(#) = henry parameter B [K]
! RLOSS(#) = mass fraction loss directly to atmosphere
! RSPRAY(#) = mass fraction applied (sprayed) to vegetation surface
! RDENS(#) = aerosol density [kg m-3] at 293 K
! REMISP(#) = fraction of (bulk) particles in emissions
! REMIS_MOD(#,NMODE) = fraction of mode-specific svoc in emissions
!                       (actual emission fraction: REMIS_MOD*REMISSP)
!                       where NMODE = 7 (follows m7 and gmxe), i.e.,
!                       'ns', 'ks', 'as', 'cs', 'ki', 'ai', 'ci'
!                       ns: nucleation soluble
!                       ks: aiten soluble
!                       as: accumulation soluble
!                       cs: coarse soluble
!                       ki: aiten insoluble
!                       ai: accumulation insoluble
!                       ci: coarse insoluble
! RPPLFER(#,6) = RBIGE, RBIGS, RBIGA, RBIGB, RBIGV, RBIGL (if param_part = 4)
!               RBIGE = excess molar refraction
!               RBIGS = polarizability
!               RBIGA = solute H-bond acidity
!               RBIGB = solute H-bond basicity
!               RBIGV = McGowan molar volume
!               RBIGL = log of hexadecane-air partition coeff.
!
! *****

!!! phenanthrene
SVOC_NAME(1) = 'PHE'
EMISS_IN(1) = 'import_rgt', 'emiss_PHE'
MOLMASS(1) = 178.2
MOLVOL(1) = 199.2
RKSOIL(1) = 5.17E-07
RKOCEAN(1) = 5.4E-08
RWSOL(1) = 1.1
RVAPP(1) = 7.0E-02
RHSOL(1) = 3.481E+04
RHVAP(1) = 7.83E+04
RHSUB(1) = 9.21E+04
RLOGKOW(1) = 4.47
RKDAM(1) = 3293.
RKDAB(1) = -3.37
KAHENRY(1) = 2.4E+01
KBHENRY(1) = 6000.
RLOSS(1) = 1.0
RSPRAY(1) = 0.0
RDENS(1) = 1174.
REMISSP(1) = 0.0
REMISS_MOD(1, :) = 0., 0., 0., 0., 0., 0., 0.
RPPLFER(1, :) = 1.92, 1.28, 0., 0.29, 1.45, 7.71

/

```

Figure 2: continued

## 2. Physics and chemistry parameters:

- `param_part`: Gas–particle partitioning scheme; 1=Lohmann–Lammel (default), 2=Finizio, 3=Junge-Pankow, or 4=ppLFER.
- `param_soilv`: Soil volatilization scheme; 1=Smit (default), 2=Jury.
- `param_bapo3`: Heterogeneous BaP oxidation with O<sub>3</sub>; 1=Pöschl (default), 2=Kwamena, 3=ROI-T, or 4=Kahan.
- `aermod_str`: MESSy submodel for aerosol microphysics (GMXe or M7).

## 3. Channel and object names to access input data

- `imp_ss_as_flux`: Sea salt in aitken-soluble mode
- `imp_om_soil`: Fraction of organic matter in soil
- `imp_rho_soil`: Soil density
- `imp_mld_oce`: Ocean mixed layer depth

## 4. Tracer properties

Table 1 lists all the required physicochemical properties for SVOC tracers, including tracer names, molecular weights, partition coefficients, Henry’s law constants, and so forth. It also shows a subroutine name to denote which process utilizes the respective properties.

# 2 Coupling with other MESSy submodels

For its computations, SVOC requires some variables from other MESSy submodels:

- Dry deposition velocities of aerosol and gas-phase SVOC tracers from DDEP (Kerkweg et al., 2006).
- Aerosol wet radius from either GMXe (Pringle et al., 2010) or M7 (Vignati et al., 2004). If GMXe is used, SVOC will also import aerosol number concentration.
- Wet deposition fluxes of gas-phase and liquid-phase SVOC tracers and scavenging tendencies of black carbon (BC) from SCAV (Tost et al., 2006). To import the wet deposition fluxes, apply `out_string = "[SVOC_NAME]; [SVOC_NAME]_1"` in `scav.nml`, whereas for the BC scavenging tendencies, apply `te_string = "BC_ks; BC_as; BC_cs; BC_ki"`.
- Air–sea exchange fluxes of SVOC tracers from AIRSEA (Pozzer et al., 2006). To let AIRSEA calculate these fluxes, prepare all the necessary information in `airsea.nml`: tracer name, molar volume, Henry’s law constants, and tracer concentration over the surface water. The last parameter is obtained from one of SVOC output variables (Table 3); hence user should set `WATER_CON_CHN(#) = "svoc_gp", "CWAT_[SVOC_NAME]"` in `airsea.nml`.

**Table 1: List of input parameters for tracer properties defined in svoc.nml file**

| Parameter | Description                                                                          | Unit                           | Related subroutine(s)                                                               |
|-----------|--------------------------------------------------------------------------------------|--------------------------------|-------------------------------------------------------------------------------------|
| SVOC_NAME | Tracer name                                                                          |                                | svoc_new_tracer                                                                     |
| EMISS_IN  | Import emission data (channel, object)                                               |                                | svoc_init_coupling                                                                  |
| MOLMASS   | Molecular mass                                                                       | $\text{g mol}^{-1}$            | svoc_new_tracer                                                                     |
| MOLVOL    | Molar volume                                                                         | $\text{cm}^3 \text{ mol}^{-1}$ | not used in SVOC, but needed in AIRSEA                                              |
| RKSOIL    | 1 <sup>st</sup> order degradation rate in soil                                       | $\text{s}^{-1}$                | svoc_degradation                                                                    |
| RKOCAN    | 1 <sup>st</sup> order degradation rate in ocean                                      | $\text{s}^{-1}$                | svoc_degradation                                                                    |
| RWSOL     | Water solubility                                                                     | $\text{mg L}^{-1}$             | svoc_vola_glac_snow                                                                 |
| RVAPP     | Saturated vapor pressure                                                             | Pa                             | svoc_vola_veg,<br>svoc_vola_glac_snow,<br>svoc_part_lohlam,<br>svoc_part_junge      |
| RHSOL     | Heat of solution                                                                     | $\text{J mol}^{-1}$            | svoc_vola_glac_snow                                                                 |
| RHVAP     | Heat of vaporization                                                                 | $\text{J mol}^{-1}$            | see RVAPP,<br>svoc_part_pplfers                                                     |
| RHSUB     | Heat of condensation of sub-cooled liquid                                            | $\text{J mol}^{-1}$            | svoc_vola_glac_snow                                                                 |
| RLOGKOW   | Octanol–water partition coefficient                                                  | -                              | svoc_vola_soil_smit,<br>svoc_vola_soil_jury                                         |
| RKOAM     | Slope of temperature-dependent octanol–air partition coefficient ( $K_{\text{oa}}$ ) | -                              | svoc_part_lohlam,<br>svoc_part_finizio                                              |
| RKOAB     | Intercept of temperature-dependent $K_{\text{oa}}$                                   | -                              | see RKOAM                                                                           |
| KAHENRY   | Henry coefficient at 25°C                                                            | $\text{M atm}^{-1}$            | svoc_drydep,<br>svoc_vola_glac_snow,<br>svoc_vola_soil_jury,<br>svoc_vola_soil_smit |
| KBHENRY   | Constant for the temperature-correction of Henry coefficient                         |                                | see KAHENRY                                                                         |
| RLOSS     | Fraction of emission release to the atmosphere                                       | -                              | svoc_vdiff(1)                                                                       |
| RSPRAY    | Fraction of emission applied (sprayed) to surface                                    | -                              | svoc_vdiff(1)                                                                       |
| RDENS     | SVOC particle density                                                                | $\text{kg m}^{-3}$             | svoc_new_tracer                                                                     |
| REMISP    | Fraction of emission emitted as particles                                            | -                              | svoc_vdiff(1)                                                                       |
| REMIS_MOD | Fraction of REMISP assigned into each aerosol mode (7 comma-separated values)        | -                              | svoc_vdiff(1)                                                                       |
| RPPLFER   | Solute descriptors for ppLFER (6 comma-separated values)                             |                                | svoc_part_pplfers                                                                   |

### 3 Starting a simulation

To prepare an SVOC run, activate the submodel (set `USE_SVOC = .TRUE.` in `switch.nml`), fill in all input parameters in `svoc.nml` and other namelists, and setup the gaseous and liquid chemistry of SVOC tracers in MECCA and SCAV (more details in the manual of each submodel, Sander et al. (2011) and Tost et al. (2006), respectively).

### 4 Input and output

The following input data should be available in their desirable units: (a) Emission fluxes in  $\text{kg m}^{-2} \text{s}^{-1}$ , (b) soil density in  $\text{kg m}^{-3}$ , and (c) ocean mixed layer depth in m. Running EMAC-SVOC generates two output files in addition to other standard MESSy output: (a) `[EXP_NAME]_____yyyymmddd_hhmm_svoc_inp` which stores the three input data after regridding, unit conversion, and other treatment (see Table 2), and (b) `[EXP_NAME]_____yyyymmddd_hhmm_svoc_gp` which stores some diagnostic quantities, refer to the list in Table 3.

**Table 2: List of variables in `svoc_inp` channel**

| Variable                      | Definition                         | Unit                                                                                                     |
|-------------------------------|------------------------------------|----------------------------------------------------------------------------------------------------------|
| <code>appl_[SVOC_NAME]</code> | Application/emissions              | $\text{mol}_{\text{tr}} \text{mol}_{\text{air}}^{-1} \text{kg}_{\text{air}} \text{m}^{-2} \text{s}^{-1}$ |
| <code>rhos</code>             | Soil density                       | $\text{kg}_{\text{solid}} \text{m}^{-3}$                                                                 |
| <code>foms</code>             | Fraction of organic matter in soil | $\text{kg}_{\text{OM}} \text{kg}_{\text{solid}}^{-1} \text{m}^{-3}$                                      |
| <code>ocn_mld</code>          | Ocean mixed layer depth            | m                                                                                                        |



**Table 3: List of variables in svoc\_gp channel**

| Variable               | Definition                                                                         | Unit                                                | Dimension     | Note                                                                                |
|------------------------|------------------------------------------------------------------------------------|-----------------------------------------------------|---------------|-------------------------------------------------------------------------------------|
| Kp_[SVOC_NAME]         | Gas-particle partition coefficient (bulk)                                          | $\text{m}^3 \mu\text{g}^{-1}$                       | LON, LAT, LEV |                                                                                     |
| Kp_[SVOC_NAME]_[cm]    | Gas-particle partition coefficient at mode cm (namely, ns, cs, as, ks, ki, ai, ci) | $\text{m}^3 \mu\text{g}^{-1}$                       | LON, LAT, LEV |                                                                                     |
| THETA_[SVOC_NAME]      | Particulate mass fraction (bulk)                                                   | -                                                   | LON, LAT, LEV |                                                                                     |
| THETA_[SVOC_NAME]_[cm] | Particulate mass fraction at mode cm (namely, ns, cs, as, ks, ki, ai, ci)          | -                                                   | LON, LAT, LEV |                                                                                     |
| BURD_[SVOC_NAME]       | Tracer burden in environmental compartments                                        | $\text{kg}_{\text{tr}} \text{m}^{-2}$               | LON, LAT, LEV | LEV (bottom to top): 1=soil, 2=vegetation, 3=ocean, 4=snow, 5=glacier, 6=atmosphere |
| VOLA_[SVOC_NAME]       | Volatilization flux from surface compartments                                      | $\text{kg}_{\text{tr}} \text{m}^{-2} \text{s}^{-1}$ | LON, LAT, LEV | LEV (bottom to top): 1=soil, 2=vegetation, 3=ocean, 4=snow, 5=glacier               |
| DEPO_[SVOC_NAME]       | Deposition fluxes                                                                  | $\text{kg}_{\text{tr}} \text{m}^{-2} \text{s}^{-1}$ | LON, LAT, LEV | LEV (bottom to top): 1=dry, 2=wet, 3=total                                          |
| DEGR_[SVOC_NAME]       | Biotic degradation rate                                                            | $\text{kg}_{\text{tr}} \text{m}^{-2} \text{s}^{-1}$ | LON, LAT, LEV | LEV (bottom to top): 1=soil, 2=vegetation, 3=ocean                                  |
| CWAT_[SVOC_NAME]       | Tracer concentration in the ocean                                                  | $\text{kmol m}^{-3}$                                | LON, LAT      |                                                                                     |

## References

- Endo, S. and Goss, K.-U.: Applications of polyparameter linear free energy relationships in environmental chemistry, *Environ. Sci. Technol.*, 48, 12 477–12 491, doi:10.1021/es503369t, URL <http://pubs.acs.org/doi/abs/10.1021/es503369t>, 2014.
- Finizio, A., Mackay, D., Bidleman, T., and Harner, T.: Octanol–air partition coefficient as a predictor of partitioning of semi-volatile organic chemicals to aerosols, *Atmos. Environ.*, 31, 2289–2296, doi:10.1016/S1352-2310(97)00013-7, URL <http://www.sciencedirect.com/science/article/pii/S1352231097000137>, 1997.
- Goss, K.-U. and Schwarzenbach, R. P.: Linear free energy relationships used to evaluate equilibrium partitioning of organic compounds, *Environ. Sci. Technol.*, 35, 1–9, doi:10.1021/es000996d, URL <https://pubs.acs.org/doi/pdfplus/10.1021/es000996d>, 2001.
- Junge, C.: Basic considerations about trace constituents in the atmosphere as related to the fate of global pollutants, pp. 7–26, John Wiley & Sons, New York, 1977.
- Jury, W. A., Spencer, W. F., and Farmer, W. J.: Behavior assessment model for trace organics in soil: I. Model description, *J. Environ. Qual.*, 12, 558–564, doi:10.2134/jeq1983.00472425001200040025x, URL <https://www.soils.org/publications/jeq/abstracts/12/4/558>, 1983.
- Jury, W. A., Russo, D., Streile, G., and El Abd, H.: Evaluation of volatilization by organic chemicals residing below the soil surface, *Water Resour. Res.*, 26, 13–20, doi:10.1029/WR026i001p00013, URL <http://onlinelibrary.wiley.com/doi/10.1029/WR026i001p00013/pdf>, 1990.
- Kahan, T. F., Kwamena, N. O. A., and Donaldson, D. J.: Heterogeneous ozonation kinetics of polycyclic aromatic hydrocarbons on organic films, *Atmos. Environ.*, 40, 3448–3459, doi:10.1016/j.atmosenv.2006.02.004, URL <http://www.sciencedirect.com/science/article/pii/S1352231006002019>, 2006.
- Kerkweg, A., Buchholz, J., Ganzeveld, L., Pozzer, A., Tost, H., and Jöckel, P.: Technical Note: An implementation of the dry removal processes DRY DEPosition and SEDimentation in the Modular Earth Submodel System (MESSy), *Atmos. Chem. Phys.*, 6, 4617–4632, doi:10.5194/acp-6-4617-2006, URL <http://www.atmos-chem-phys.net/6/4617/2006/>, 2006.
- Kwamena, N.-O. A., Thornton, J. A., and Abbatt, J. P. D.: Kinetics of surface-bound benzo[a]pyrene and ozone on solid organic and salt aerosols, *J. Phys. Chem. A*, 108, 11 626–11 634, doi:10.1021/jp046161x, URL <http://pubs.acs.org/doi/abs/10.1021/jp046161x>, 2004.
- Lohmann, R. and Lammel, G.: Adsorptive and absorptive contributions to the gas–particle partitioning of polycyclic aromatic hydrocarbons: State of knowledge and recommended parametrization for modeling, *Environ. Sci. Technol.*, 38, 3793–3803, doi:10.1021/es035337q, URL <http://pubs.acs.org/doi/pdfplus/10.1021/es035337q>, 2004.
- Mu, Q., Shiraiwa, M., Octaviani, M., Ma, N., Ding, A., Su, H., Lammel, G., Pöschl, U., and Cheng, Y.: Temperature effect on phase state and reactivity controls atmospheric multiphase chemistry and transport of PAHs, *Sci. Adv.*, 4, doi:10.1126/sciadv.aap7314, URL <http://advances.sciencemag.org/content/4/3/eaap7314.abstract>, 2018.
- Pankow, J. F.: Review and comparative analysis of the theories on partitioning between the gas and aerosol particulate phases in the atmosphere, *Atmos. Environ.*, 21, 2275–2283, doi:10.1016/0004-6981(87)90363-5, URL <http://www.sciencedirect.com/science/article/pii/0004698187903635>, 1987.

- Pöschl, U., Letzel, T., Schauer, C., and Niessner, R.: Interaction of ozone and water vapor with spark discharge soot aerosol particles coated with benzo[a]pyrene: O<sub>3</sub> and H<sub>2</sub>O adsorption, benzo[a]pyrene degradation, and atmospheric Implications, *J. Phys. Chem. A*, 105, 4029–4041, doi:10.1021/jp004137n, URL <http://pubs.acs.org/doi/abs/10.1021/jp004137n>, 2001.
- Pozzer, A., Jöckel, P., Sander, R., Williams, J., Ganzeveld, L., and Lelieveld, J.: Technical Note: The MESSy-submodel AIRSEA calculating the air–sea exchange of chemical species, *Atmos. Chem. Phys.*, 6, 5435–5444, doi:10.5194/acp-6-5435-2006, URL <http://www.atmos-chem-phys.net/6/5435/2006/>, 2006.
- Pringle, K. J., Tost, H., Message, S., Steil, B., Giannadaki, D., Nenes, A., Fountoukis, C., Stier, P., Vignati, E., and Lelieveld, J.: Description and evaluation of GMXe: a new aerosol submodel for global simulations (v1), *Geosci. Model Dev.*, 3, 391–412, doi:10.5194/gmd-3-391-2010, URL <http://www.geosci-model-dev.net/3/391/2010/>, 2010.
- Sander, R., Baumgaertner, A., Gromov, S., Harder, H., Jöckel, P., Kerkweg, A., Kubistin, D., Regelin, E., Riede, H., Sandu, A., Taraborrelli, D., Tost, H., and Xie, Z. Q.: The atmospheric chemistry box model CAABA/MECCA-3.0, *Geosci. Model Dev.*, 4, 373–380, doi:10.5194/gmd-4-373-2011, URL <http://www.geosci-model-dev.net/4/373/2011/>, 2011.
- Shahpoury, P., Lammel, G., Albinet, A., Sofuoğlu, A., Dumanoglu, Y., Sofuoğlu, S. C., Wagner, Z., and Zdimal, V.: Evaluation of a conceptual model for gas–particle partitioning of polycyclic aromatic hydrocarbons using polyparameter linear free energy relationships, *Environ. Sci. Technol.*, 50, 12 312–12 319, doi:10.1021/acs.est.6b02158, URL <http://pubs.acs.org/doi/pdfplus/10.1021/acs.est.6b02158>, 2016.
- Smit, A. A. M. F. R., Berg, F. v. d., and Leistra, M.: Estimation method for the volatilization of pesticides from fallow soil, DLO Winand Staring Centre, Wageningen, Netherlands, 1997.
- Tost, H., Jöckel, P., Kerkweg, A., Sander, R., and Lelieveld, J.: Technical Note: A new comprehensive SCAVenging submodel for global atmospheric chemistry modelling, *Atmos. Chem. Phys.*, 6, 565–574, doi:10.5194/acp-6-565-2006, URL <http://www.atmos-chem-phys.net/6/565/2006/>, 2006.
- Vignati, E., Wilson, J., and Stier, P.: M7: An efficient size-resolved aerosol microphysics module for large-scale aerosol transport models, *J. Geophys. Res. (Atmos.)*, 109, D22 202, doi:10.1029/2003JD004485, URL <http://onlinelibrary.wiley.com/doi/10.1029/2003JD004485/full>, 2004.
