# Supplementary material for: Global simulation of semivolatile organic compounds – development and evaluation of the MESSy submodel SVOC (v1.0)
Source: Copernicus journal article supplement (doi:10.5194/gmd-12-3585-2019), 2019-08-19
Supplement: Supplementary file 3 [file gmd-12-3585-2019-supplement.zip]

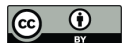

## *Supplement of*

# **Global simulation of semivolatile organic compounds – development and evaluation of the MESSy submodel SVOC (v1.0)**

**Mega Octaviani et al.**

*Correspondence to:* Gerhard Lammel ([g.lammel@mpic.de](mailto:g.lammel@mpic.de))

- [gmd-12-3585-2019-supplement-title-page.pdf](#)
- [supplement.pdf](#)
- [userguide.pdf](#)

The copyright of individual parts of the supplement might differ from the CC BY 4.0 License.
